# Supplementary material
Source: PubMed Central journal article supplement (PMC9394447)

# Supp. Fig. 5

## A

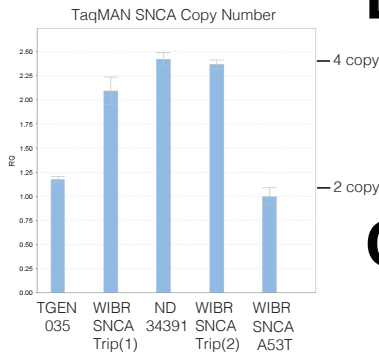

## B

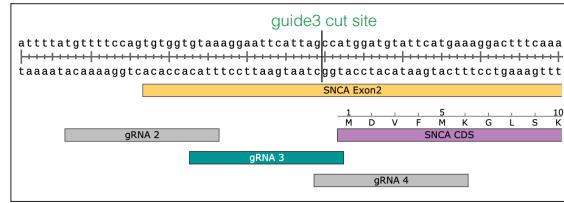

## C

| Target     | sgRNA   | Cleavage Site   | Quality Score | Cleavage activity |
|------------|---------|-----------------|---------------|-------------------|
| SNCA Exon2 | Guide 2 | ATG-12bp/Intron | 66            | 7.50%             |
| SNCA Exon2 | Guide 3 | ATG-2bp/Intron  | 66            | 42.40%            |
| SNCA Exon2 | Guide 4 | ATG+11bp/Exon   | 65            | 39.70%            |

## D

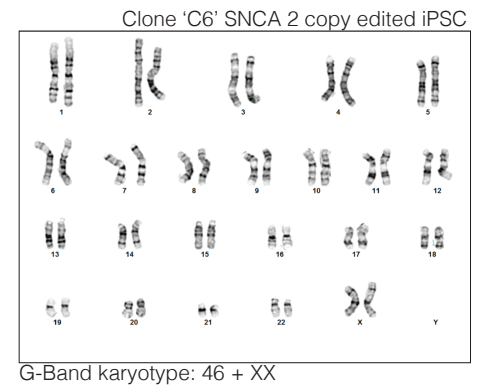

## E

Induced Neuron 2-copy SNCA (Day21)

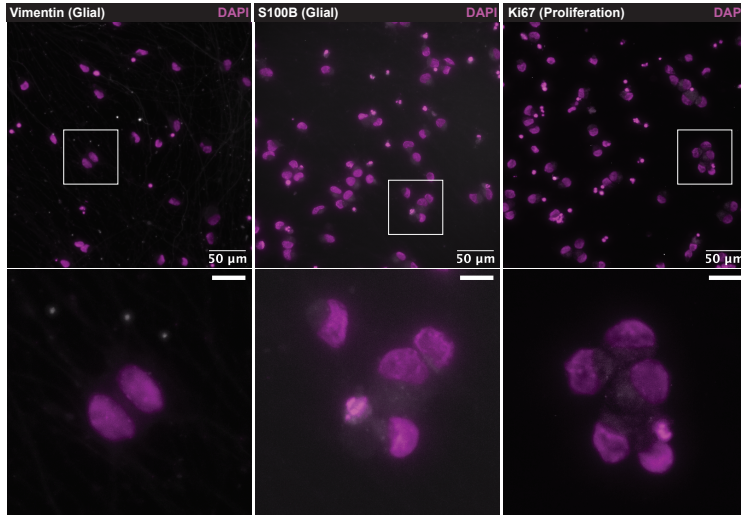

## G

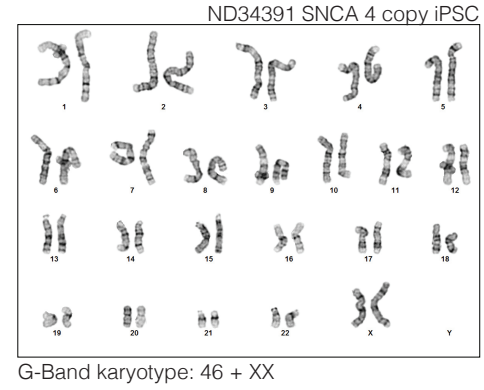

## F

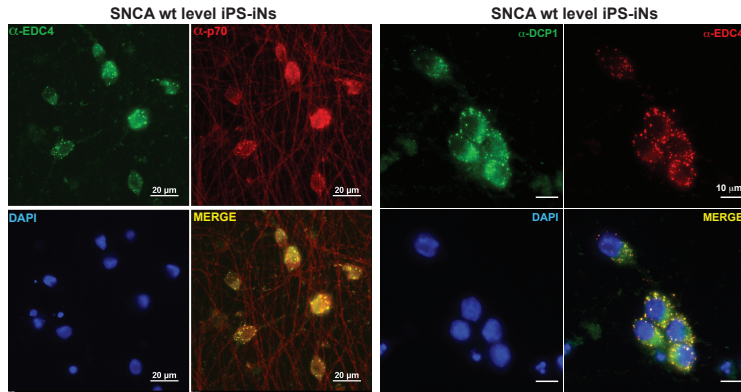

## H

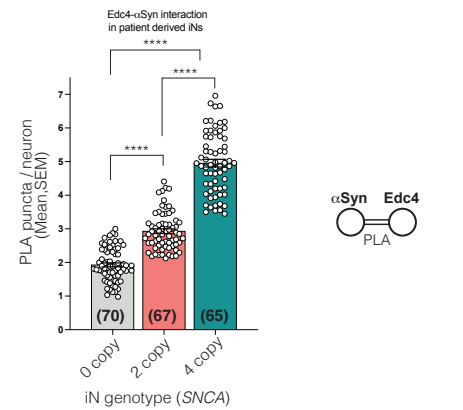

## I

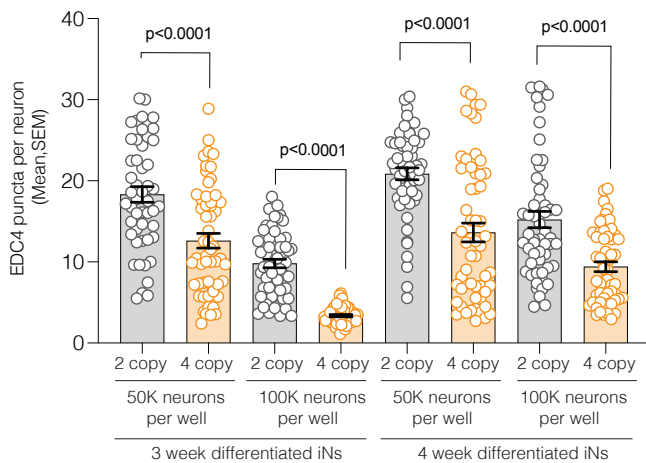

## J

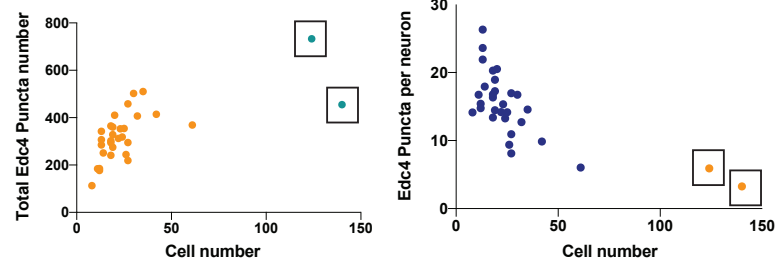

Supplement: NIHMS1815371-supplement-5.pdf [file NIHMS1815371-supplement-5.pdf]
