# Supplementary material
Source: PubMed Central journal article supplement (PMC9394447)

# Sup. Fig. 7

## A

| Pathology      | GO ID      | Description                                                         | Adjusted p-value | Direction of DE |
|----------------|------------|---------------------------------------------------------------------|------------------|-----------------|
| Any LB path    | GO:0006413 | translational initiation                                            | 1.24E-05         | Anti-correlated |
| Degree LB path | GO:0000184 | nuclear-transcribed mRNA catabolic process, nonsense-mediated decay | 3.75E-04         | Anti-correlated |
| Clin PD Dx     | GO:0000289 | nuclear-transcribed mRNA poly(A) tail shortening                    | 1.37E-02         | Anti-correlated |
| Clin PD score  | GO:0000184 | nuclear-transcribed mRNA catabolic process, nonsense-mediated decay | 3.70E-03         | Correlated      |

## B

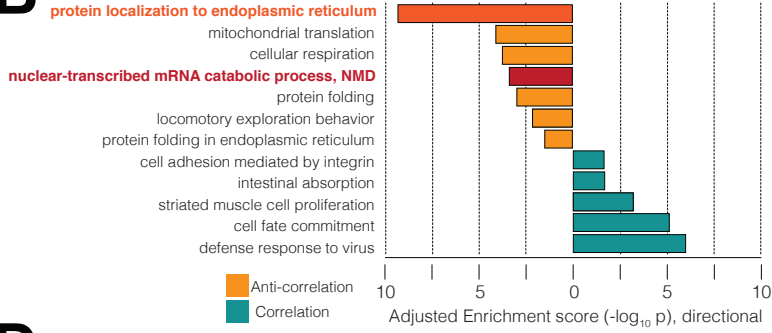

## C

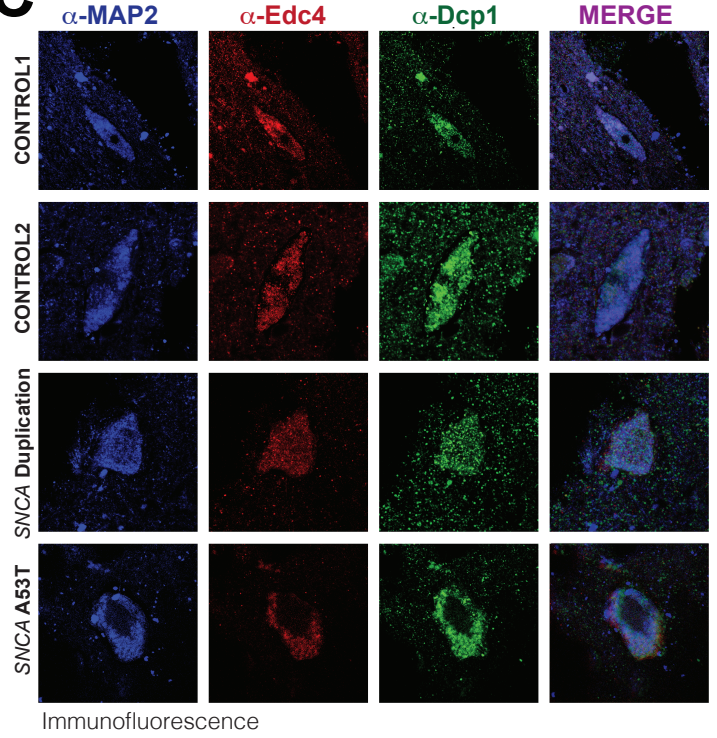

## D

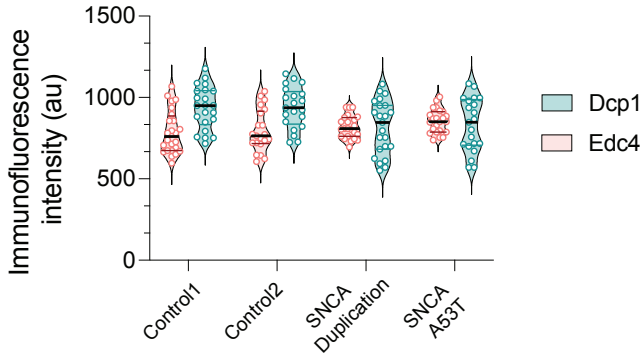

## E

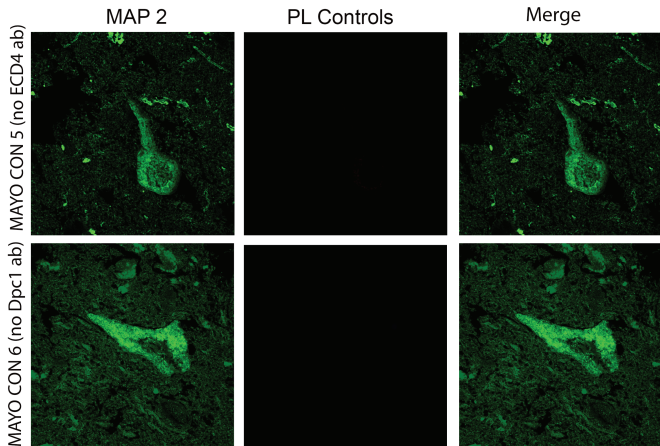

## F

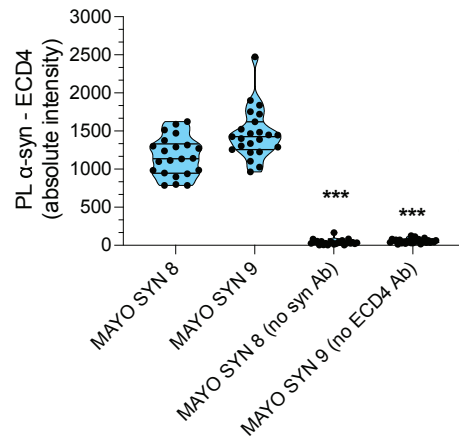

## G

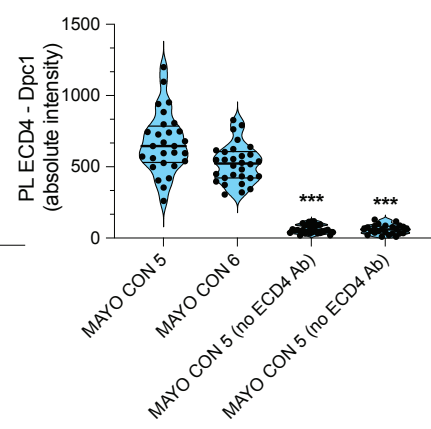

Supplement: NIHMS1815371-supplement-7.pdf [file NIHMS1815371-supplement-7.pdf]
