# Supplementary material
Source: PubMed Central journal article supplement (PMC9394447)

# Supp. Fig. 1

## A

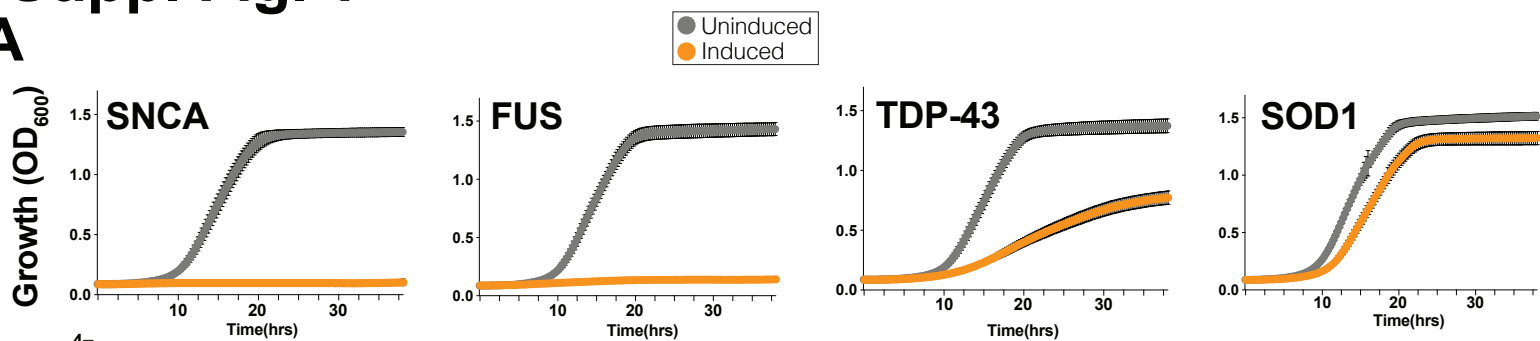

## B

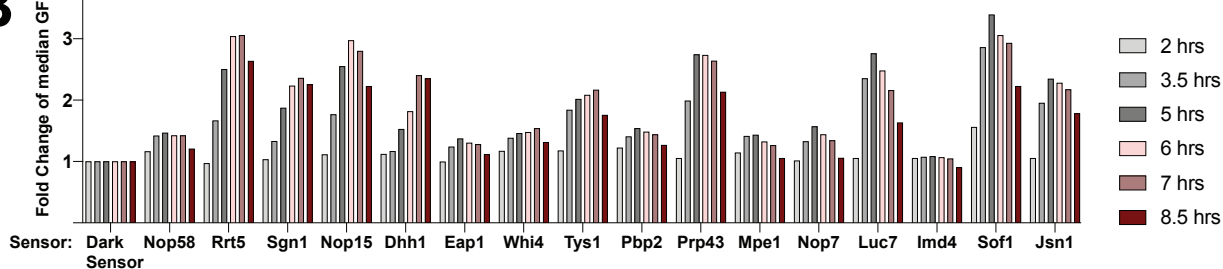

## C

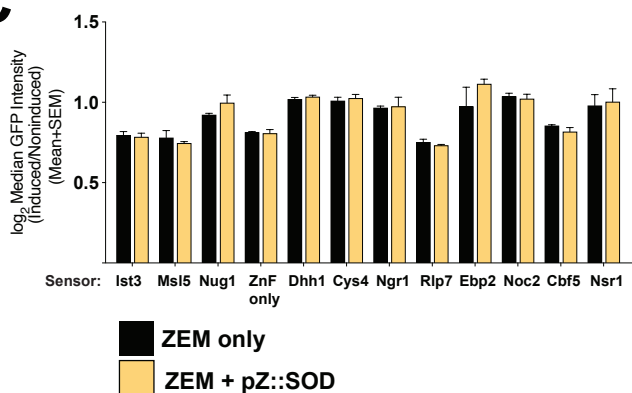

## D

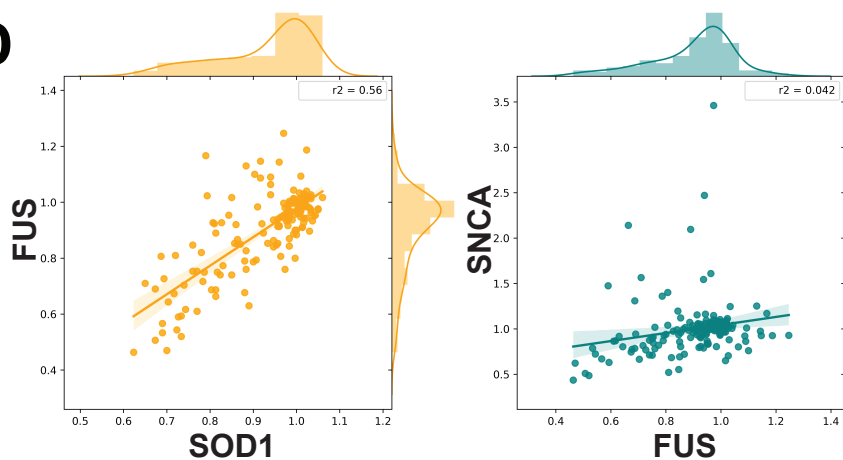

## E

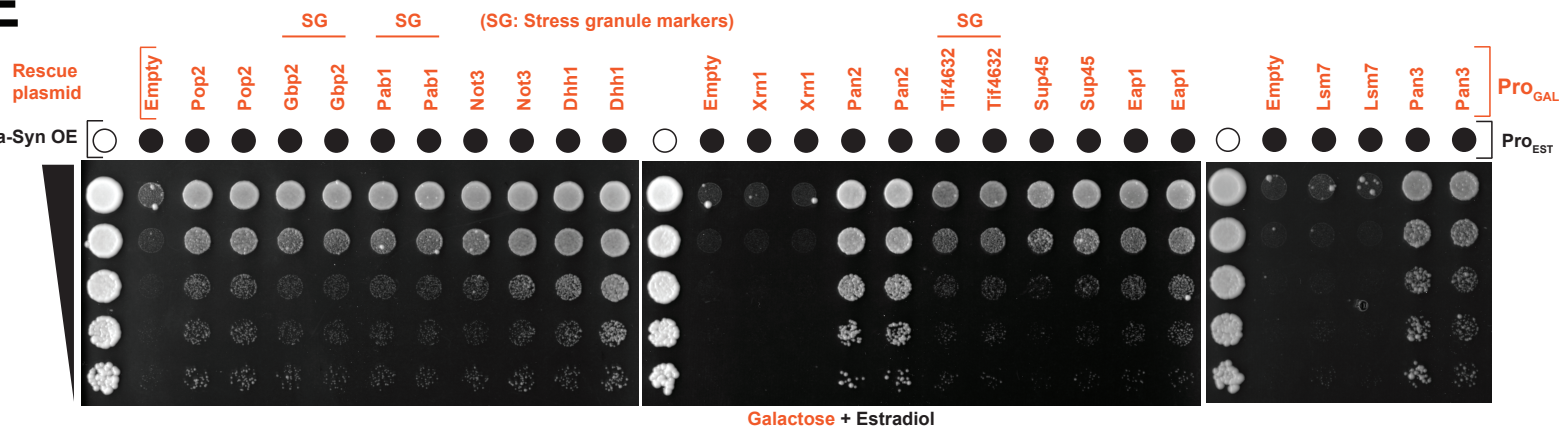

## F

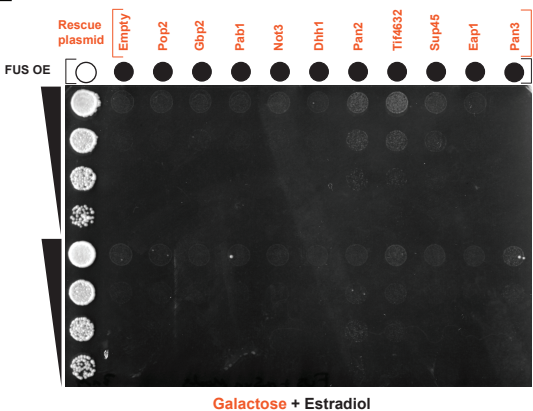

## G

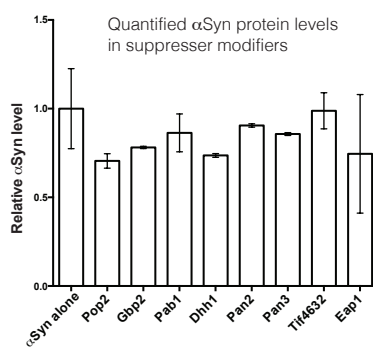

## H

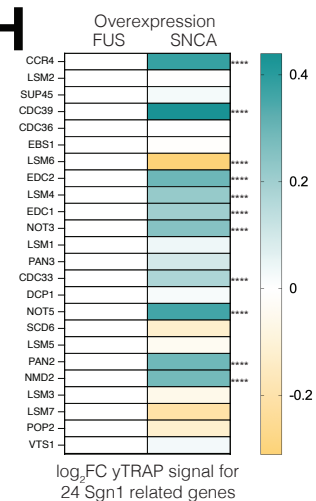

## I

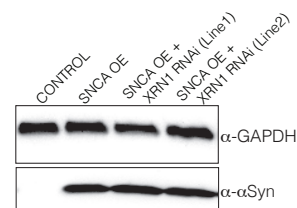

Supplement: NIHMS1815371-supplement-1.pdf [file NIHMS1815371-supplement-1.pdf]

# Supp. Fig. 3

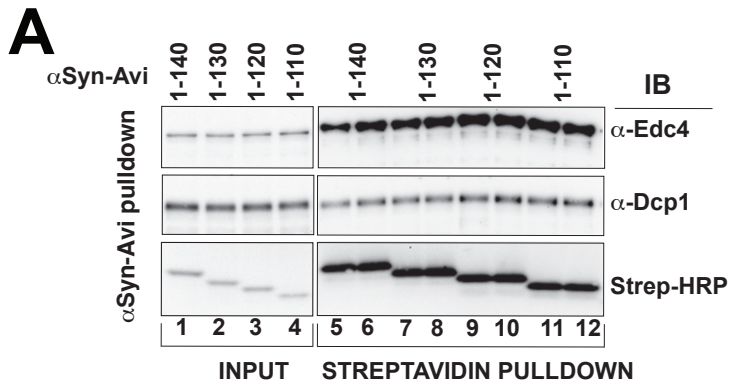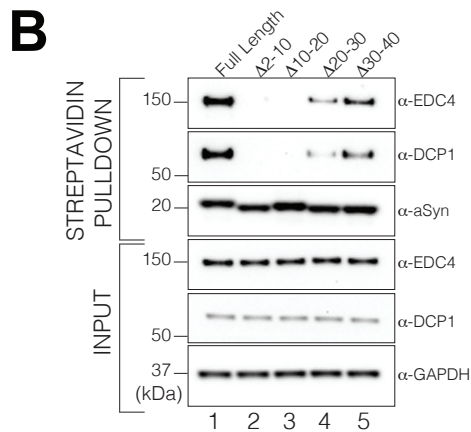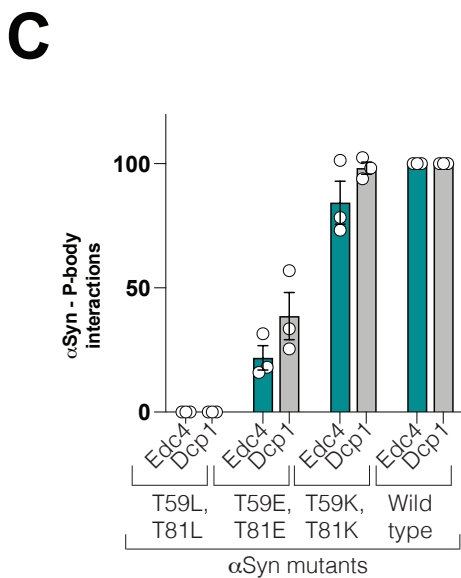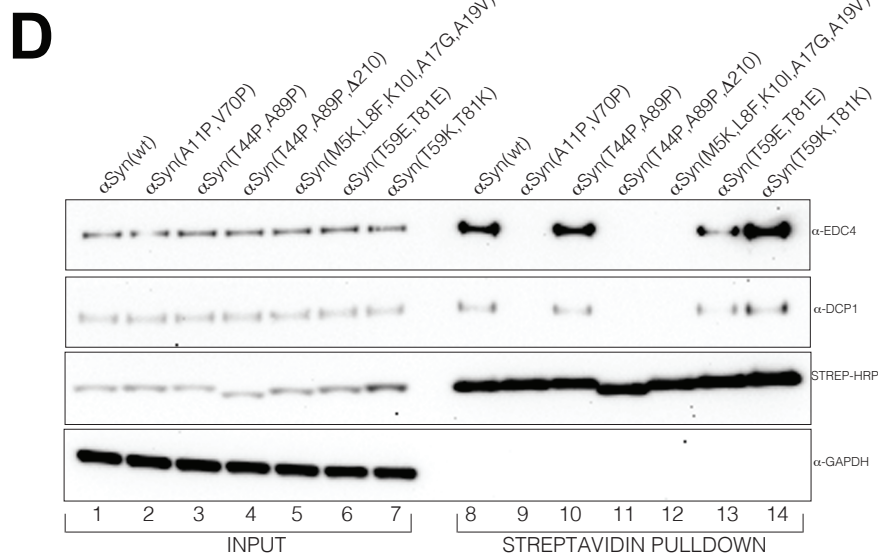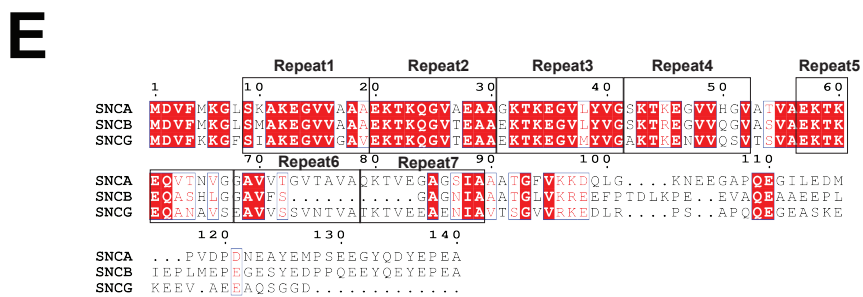

Supplement: NIHMS1815371-supplement-3.pdf [file NIHMS1815371-supplement-3.pdf]

# Supp. Fig. 6

## A

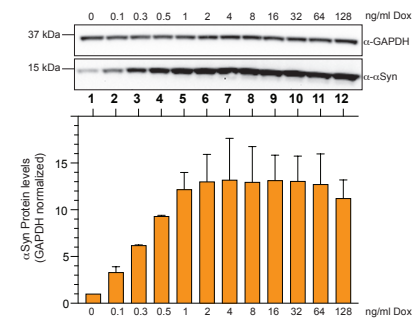

## B

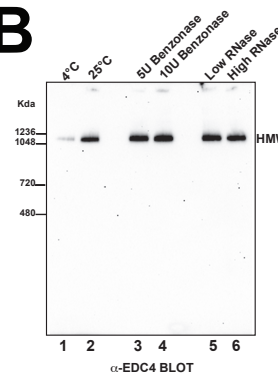

## C

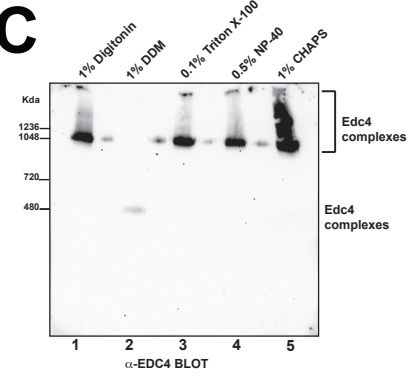

## D

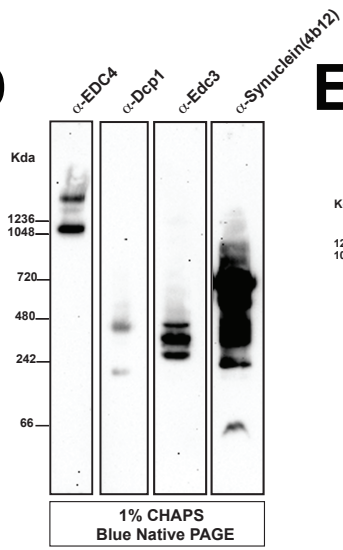

## E

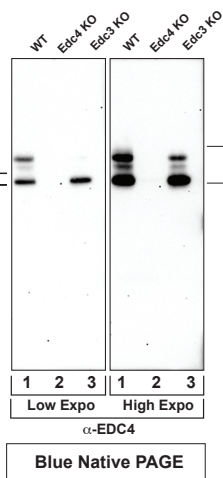

## F

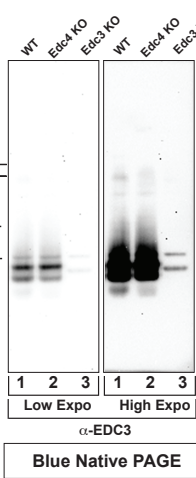

## G

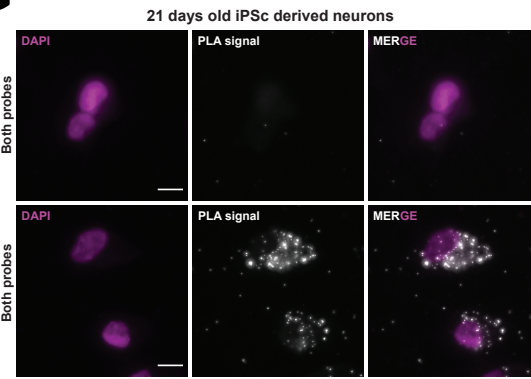

## H

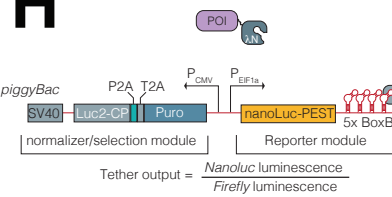

## I

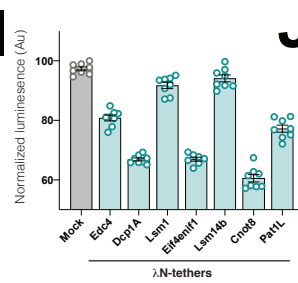

## J

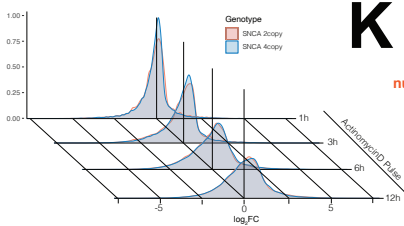

## K

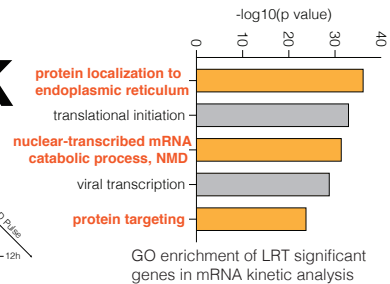

## L

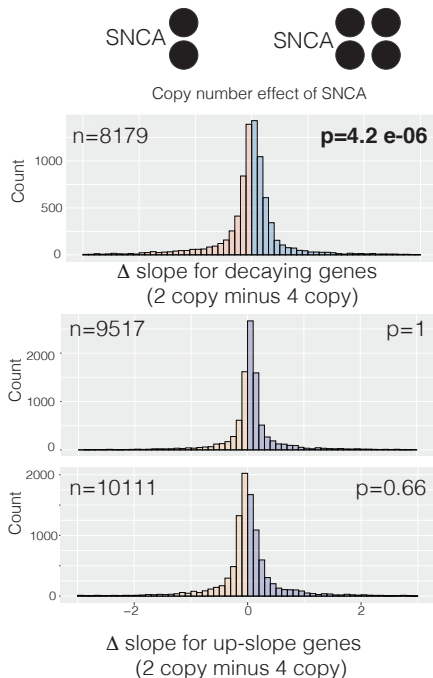

## M

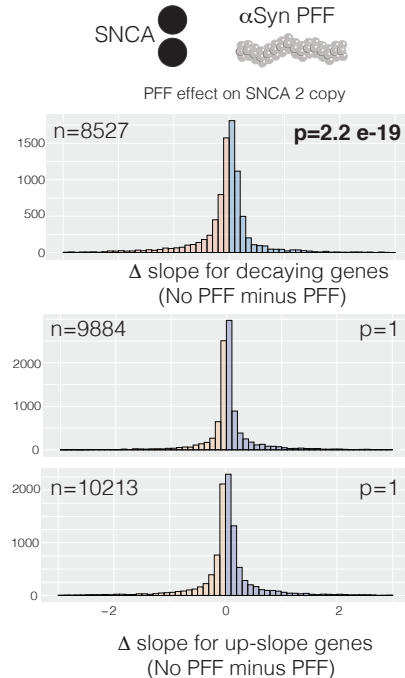

## N

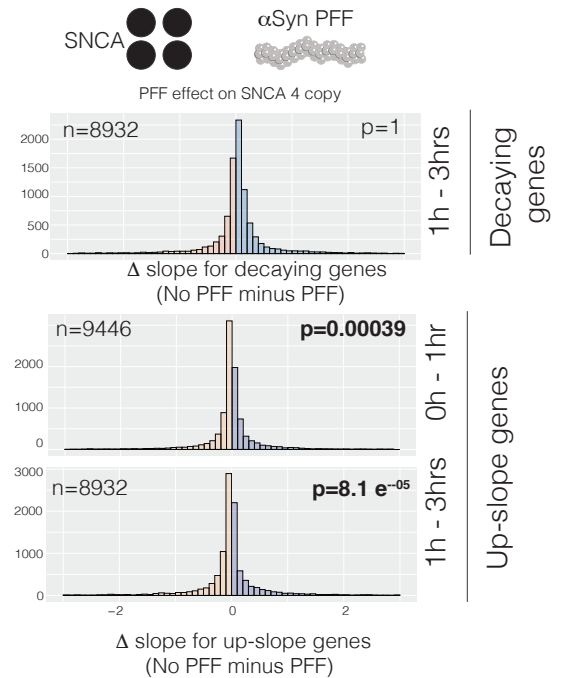

Supplement: NIHMS1815371-supplement-6.pdf [file NIHMS1815371-supplement-6.pdf]
